# Supplementary material for: Random D1–A1–D1–A2 terpolymers based on diketopyrrolopyrrole and benzothiadiazolequinoxaline (BTQx) derivatives for high-performance polymer solar cells
Source: Royal Society of Chemistry journal article supplement (doi:10.1039/c8nj05905e), 2019-01-01
Supplement: c8nj05905e1.pdf [file c8nj05905e1.pdf]

## Supplementary information

### Random D1-A1-D1-A2 Terpolymers Based on Diketopyrrolopyrrole and Benzothiadiazolequinoxaline (BTQx) Derivatives for High-Performance Polymer Solar Cells

M.L. Keshtov<sup>a\*</sup>, S.A. Kuklin<sup>a</sup>, I.O. Konstantinov<sup>a</sup>, I. E. Ostapov<sup>ab</sup>, E.E. Makhaeva<sup>b</sup>, A.Y. Nikolaev<sup>a</sup>, Zh. Xie<sup>c</sup>, Y. Zou<sup>d</sup> and Ganesh D. Sharma<sup>e\*</sup>

<sup>a</sup>Institute of Organoelement Compounds of the Russian Academy of Sciences, Vavilova St., 28, 119991 Moscow, Russian Federation

<sup>b</sup>Department of Physics of Polymers and Crystals, Faculty of Physics, M.V. Lomonosov Moscow State University, Leninskie Gory 1, 119991, Moscow, Russia

<sup>c</sup>Changchun Institute of Applied Chemistry, Chinese Academy of Sciences, Changchun 130022, China

<sup>d</sup>College of Chemistry and Chemical Engineering, Central South University, Changsha 410083, China

<sup>e</sup>Department of Physics, The LNM Institute for Information Technology, Jamdoli, Jaipur

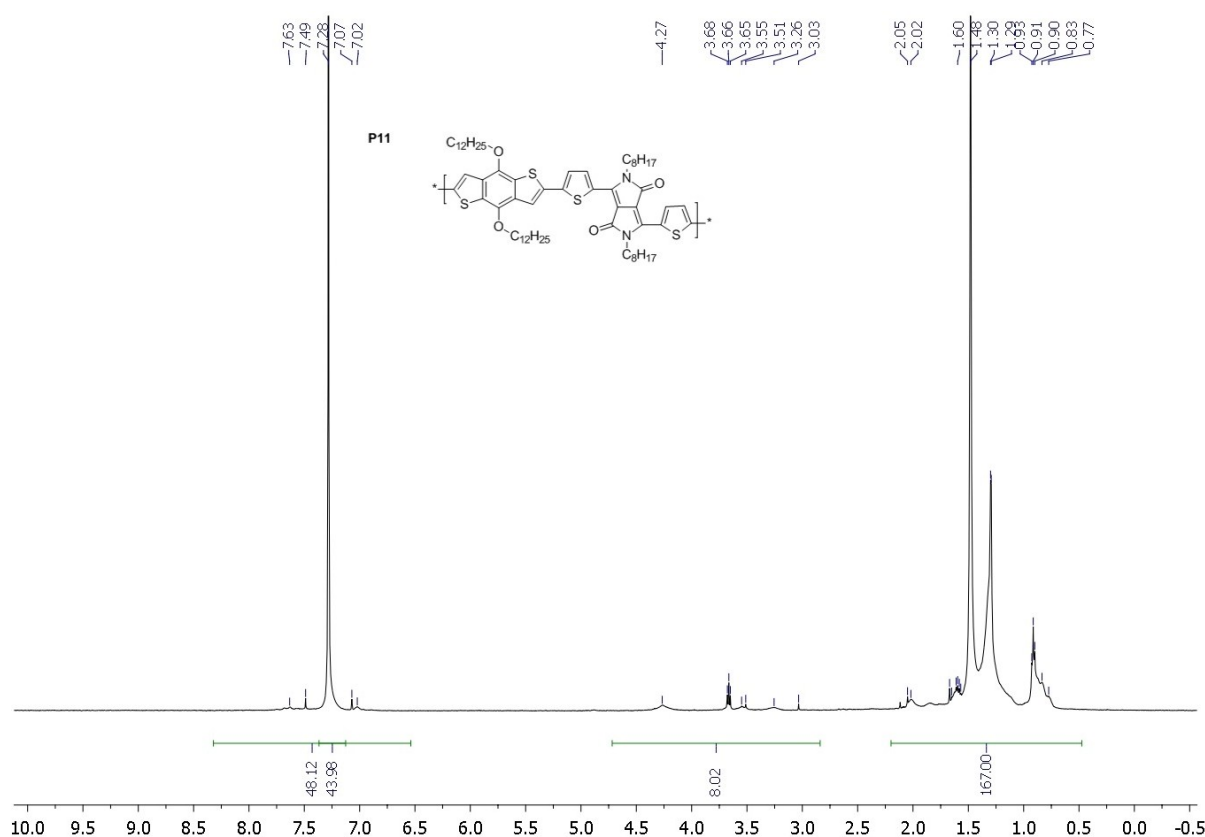

Figure S1 <sup>1</sup>H NMR spectrum of random polymer **P11** in CDCl<sub>3</sub>

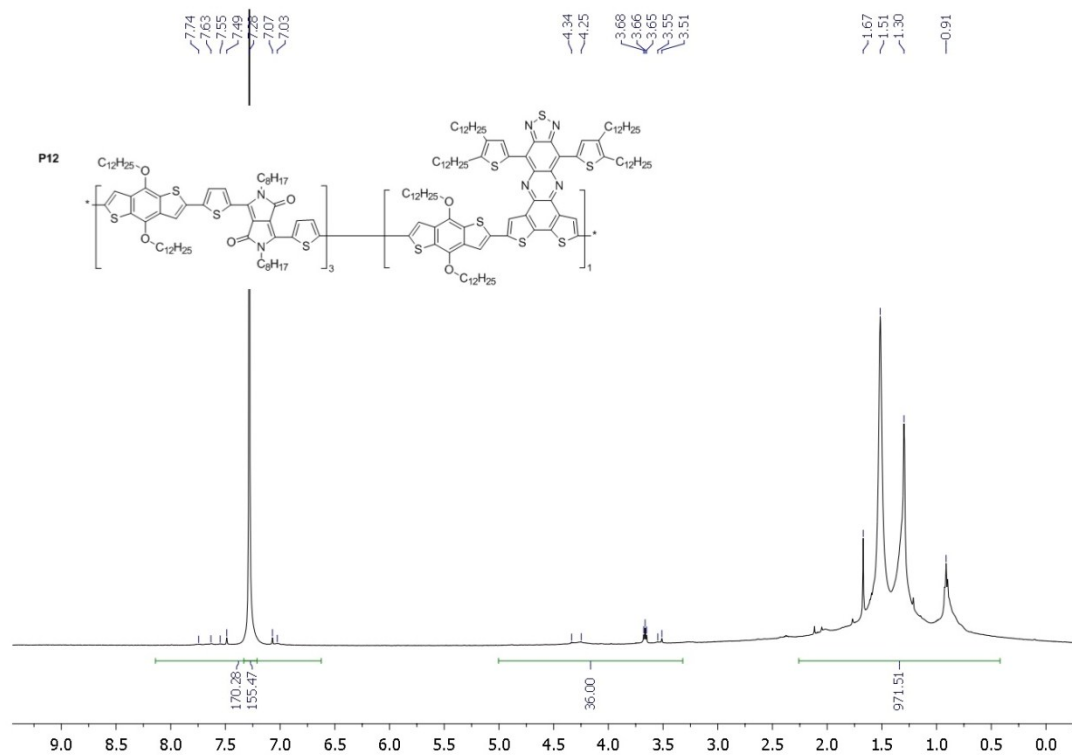

Figure S2  $^1\text{H}$  NMR spectrum of random polymer **P12** in  $\text{CDCl}_3$

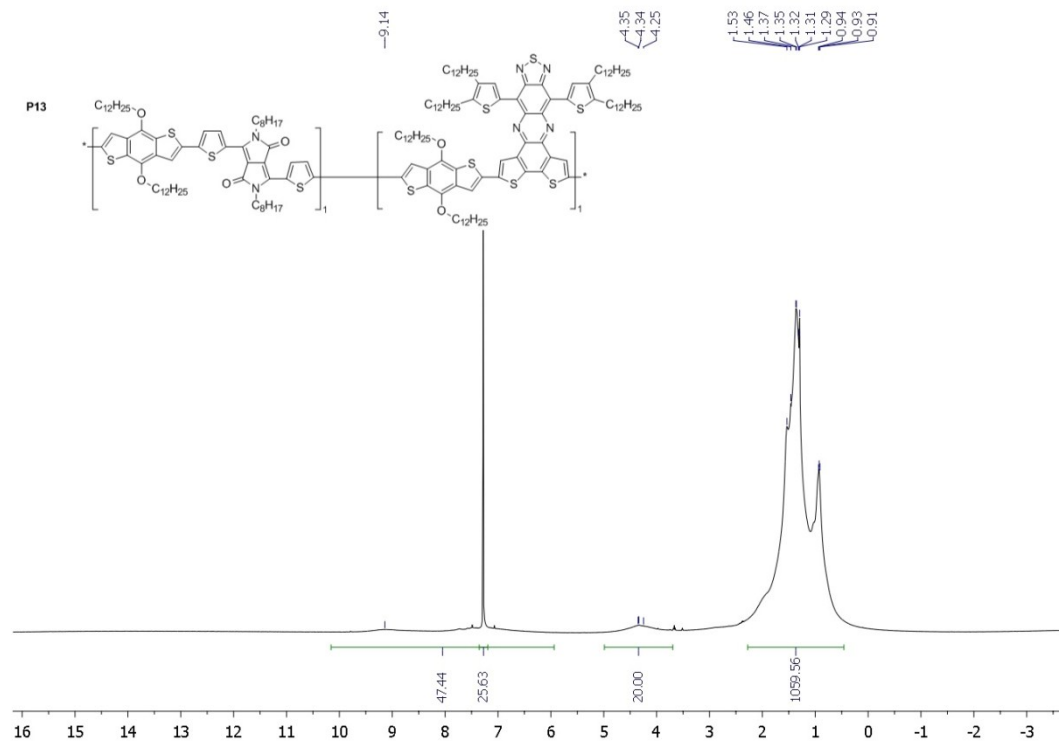

Figure S3  $^1\text{H}$  NMR spectrum of random polymer **P13** in  $\text{CDCl}_3$

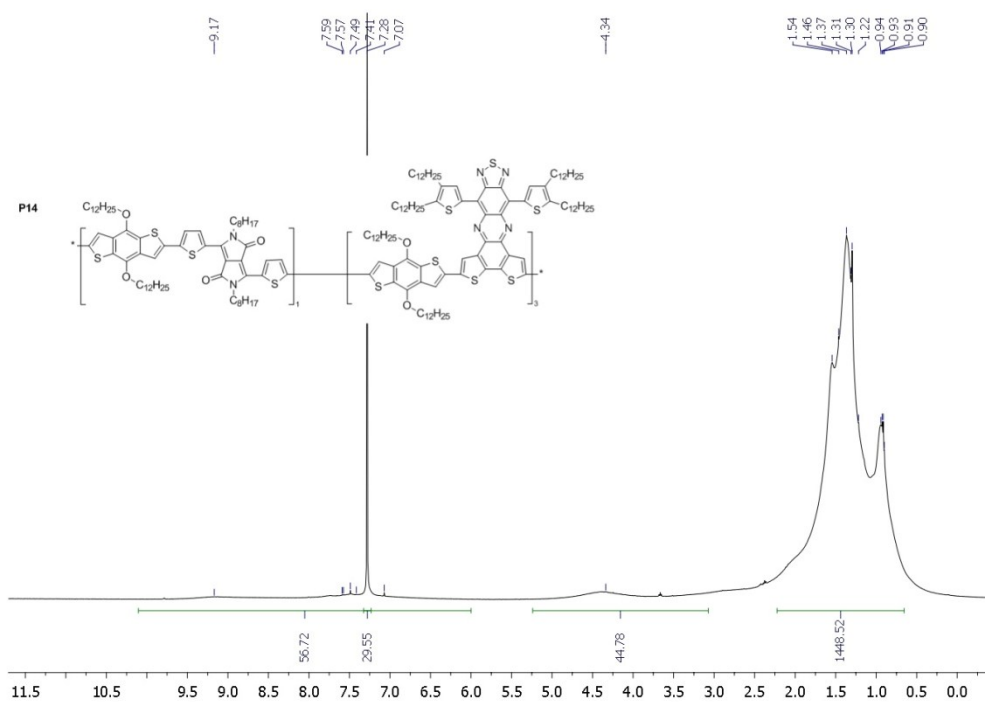

Figure S4  $^1\text{H}$  NMR spectrum of random polymer **P14** in  $\text{CDCl}_3$

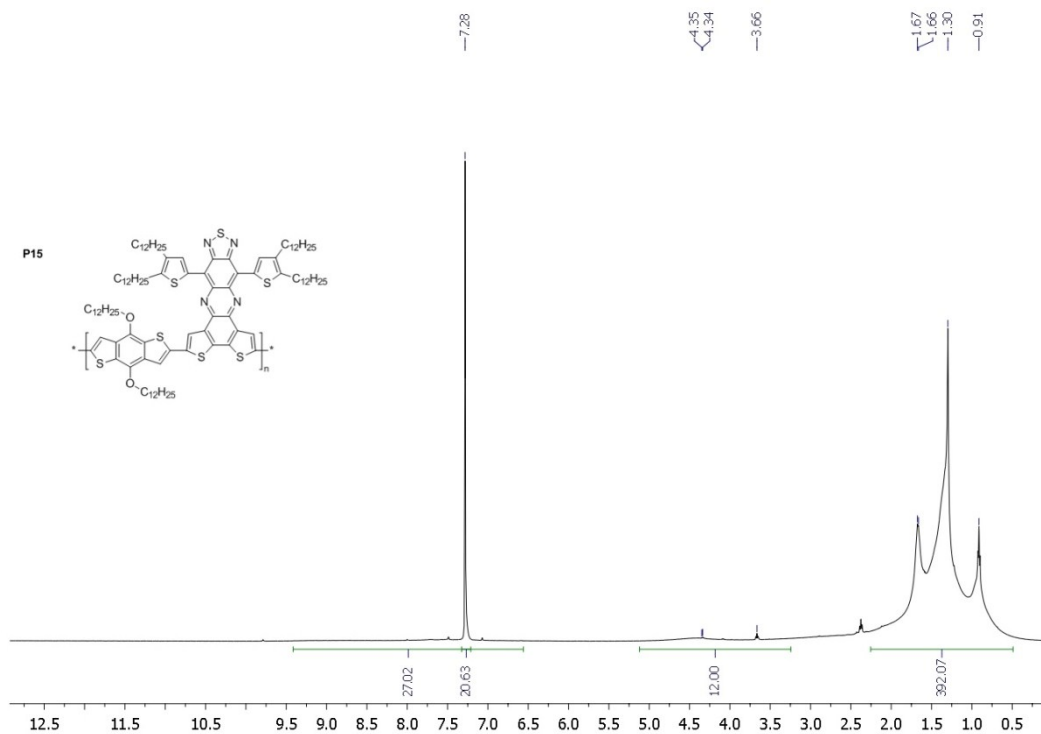

Figure S5  $^1\text{H}$  NMR spectrum of random polymer **P15** in  $\text{CDCl}_3$
